# Supplementary material for: Triggerable tough hydrogels for gastric resident dosage forms
Source: Springer Nature journal article supplement (doi:10.1038/s41467-017-00144-z), 2017-07-18
Supplement: 41467_2017_144_MOESM1_ESM.pdf [file 41467_2017_144_MOESM1_ESM.pdf]

# SI GUIDE

File Name: Supplementary Information  
Description: Supplementary Figures.

File Name: Peer Review File  
Description:

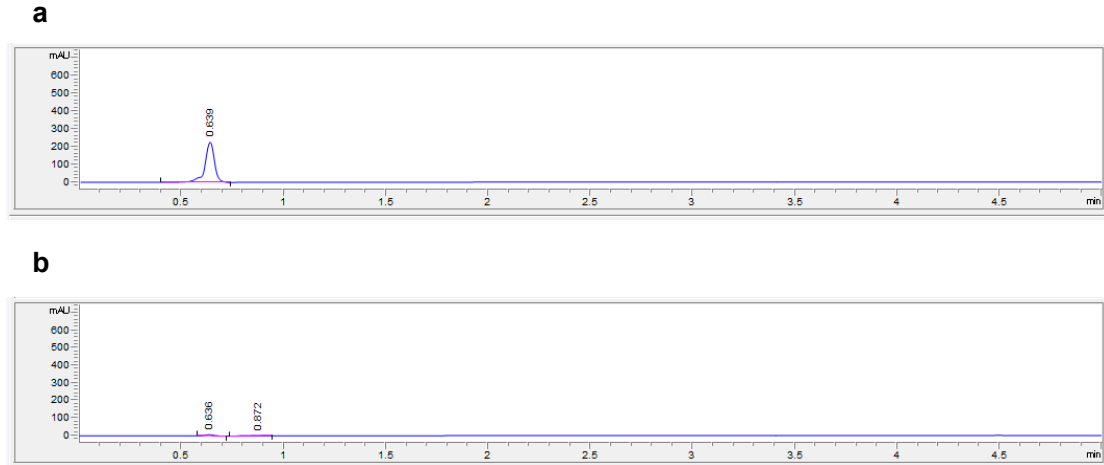

**Supplementary Figure 1. Determination of the purity of TTHs.** HPLC curves of the aqueous solutions extracted from the TTH (**a**) before and (**b**) after purification to show the complete removal of the unreacted acrylamide from the TTH.

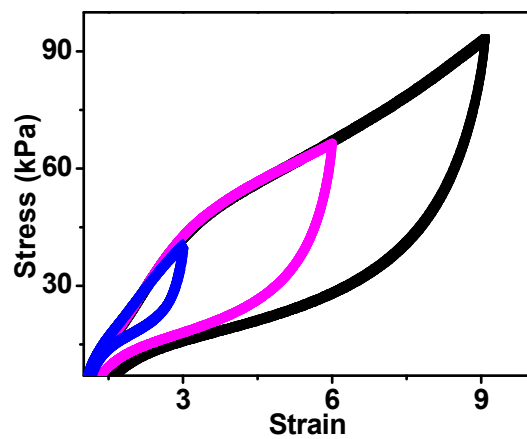

**Supplementary Figure 2. Cyclic tensile test of TTHs.** Samples of the TTH were subjected to a cycle of loading and unloading of varying maximum stretch.

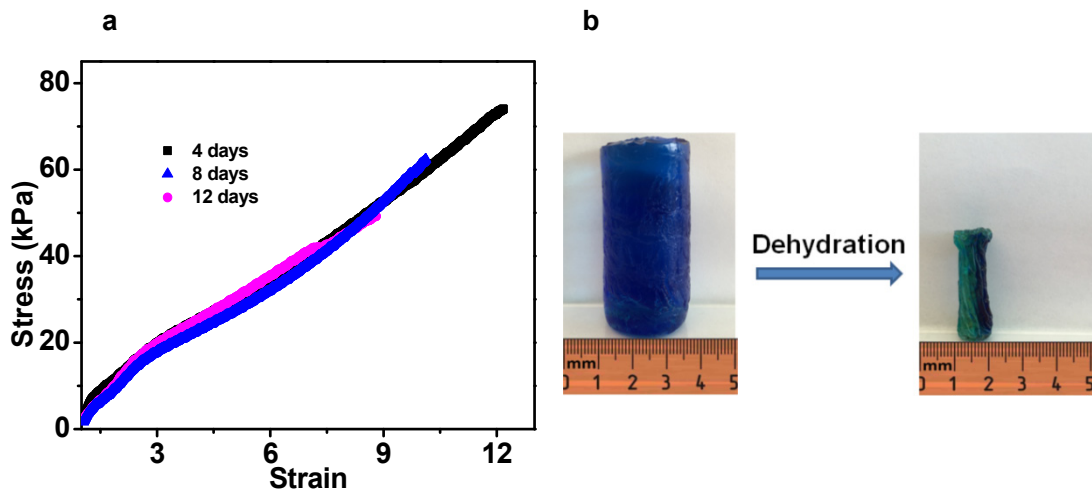

**Supplementary Figure 3. Tensile test and dehydration of TTHs.** (a) Tensile stress-strain curves of the TTH samples incubated in SGF at 37 °C for 4, 8, and 12 days. (b) Images of a cylindrical TTH sample dehydrated in air to 10 times its initial volume. The gel was labeled by methyl blue.

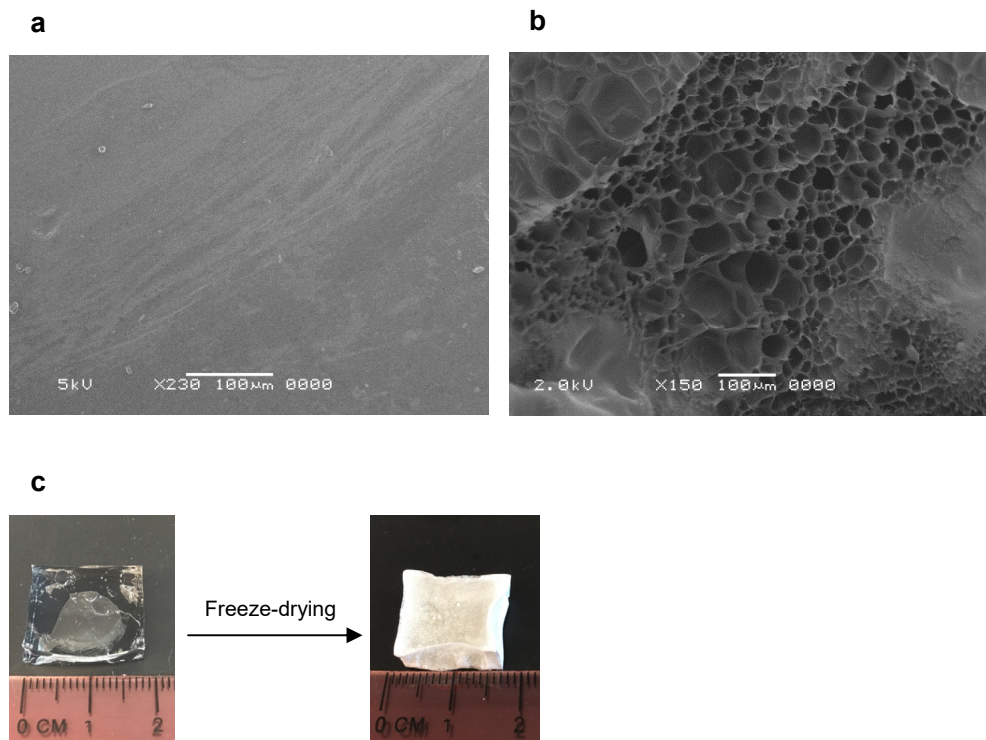

**Supplementary Figure 4. SEM measurement and lyophilization of TTHs.** Representative SEM images of the TTH samples dehydrated (a) in air and (b) by lyophilization. Scale bar: 100 µm. (c) Images of the TTH before and after freeze-drying.

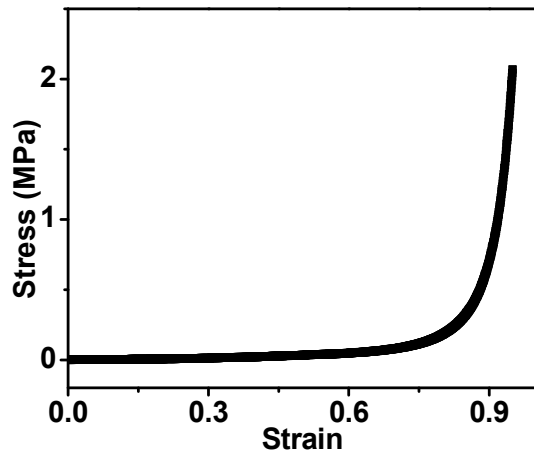

**Supplementary Figure 5. Tensile test of TTHs.** Compressive stress-strain curve of a TTH sample after a cycle of complete dehydration and subsequent rehydration.

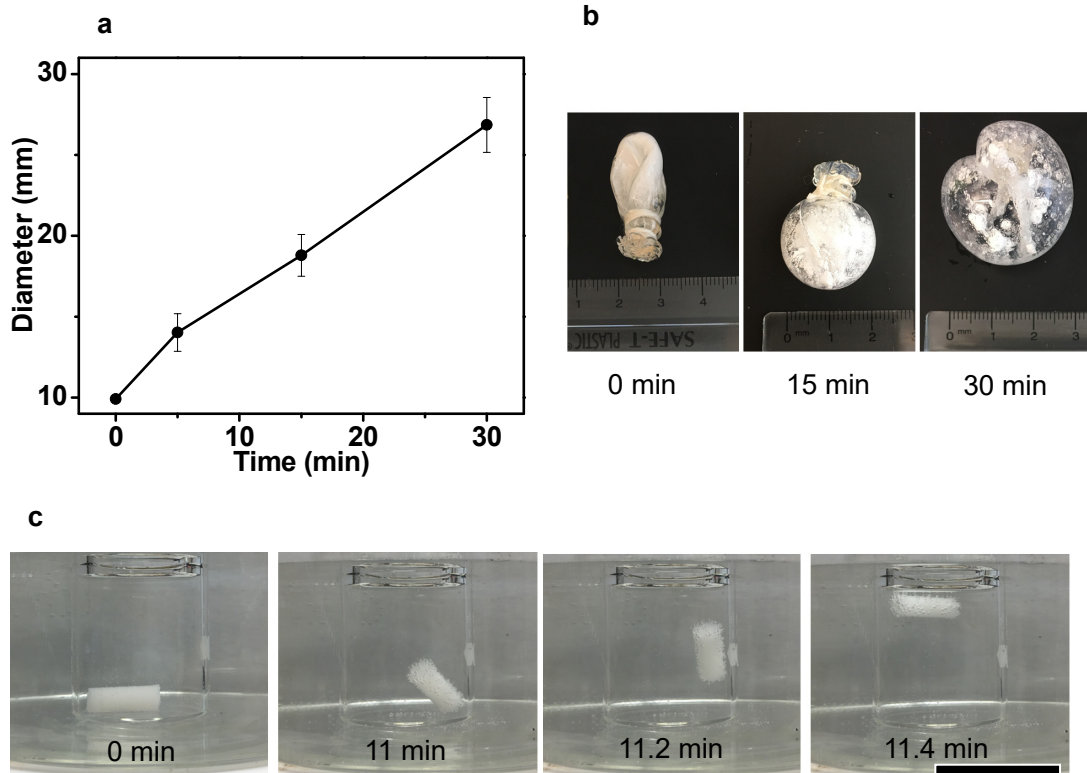

**Supplementary Figure 6. Various dosage forms of TTHs.** (a) Plot of diameter variation of the capsule-like TTH encapsulated with  $\text{CaCO}_3$  inside (thickness of TTH: 1 mm) versus the incubation time at  $37^\circ\text{C}$  in SGF. Error bars show standard deviation ( $n = 3$ ). (b) Images of the capsule-like TTH encapsulated with  $\text{CaCO}_3$  inside expanded in SGF at  $37^\circ\text{C}$ . (c) A cylindrical TTH with 5 wt%  $\text{CaCO}_3$  loading floated within 15 min in SGF at  $37^\circ\text{C}$ . Scale bar: 2.5 cm.

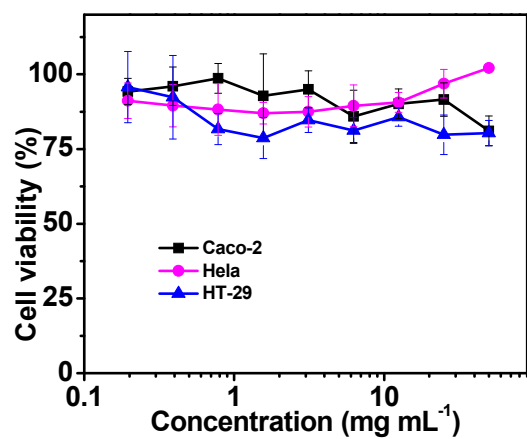

**Supplementary Figure 7. Cytotoxicity of TTHs.** Viability of cells cultured in the medium incubated with the TTH at 37 °C for 24 h with a dosage range from 0.2 to 50 mg mL<sup>-1</sup>. The cells were incubated in the medium for 24 h. Error bars show standard deviation ( $n = 6$ ).

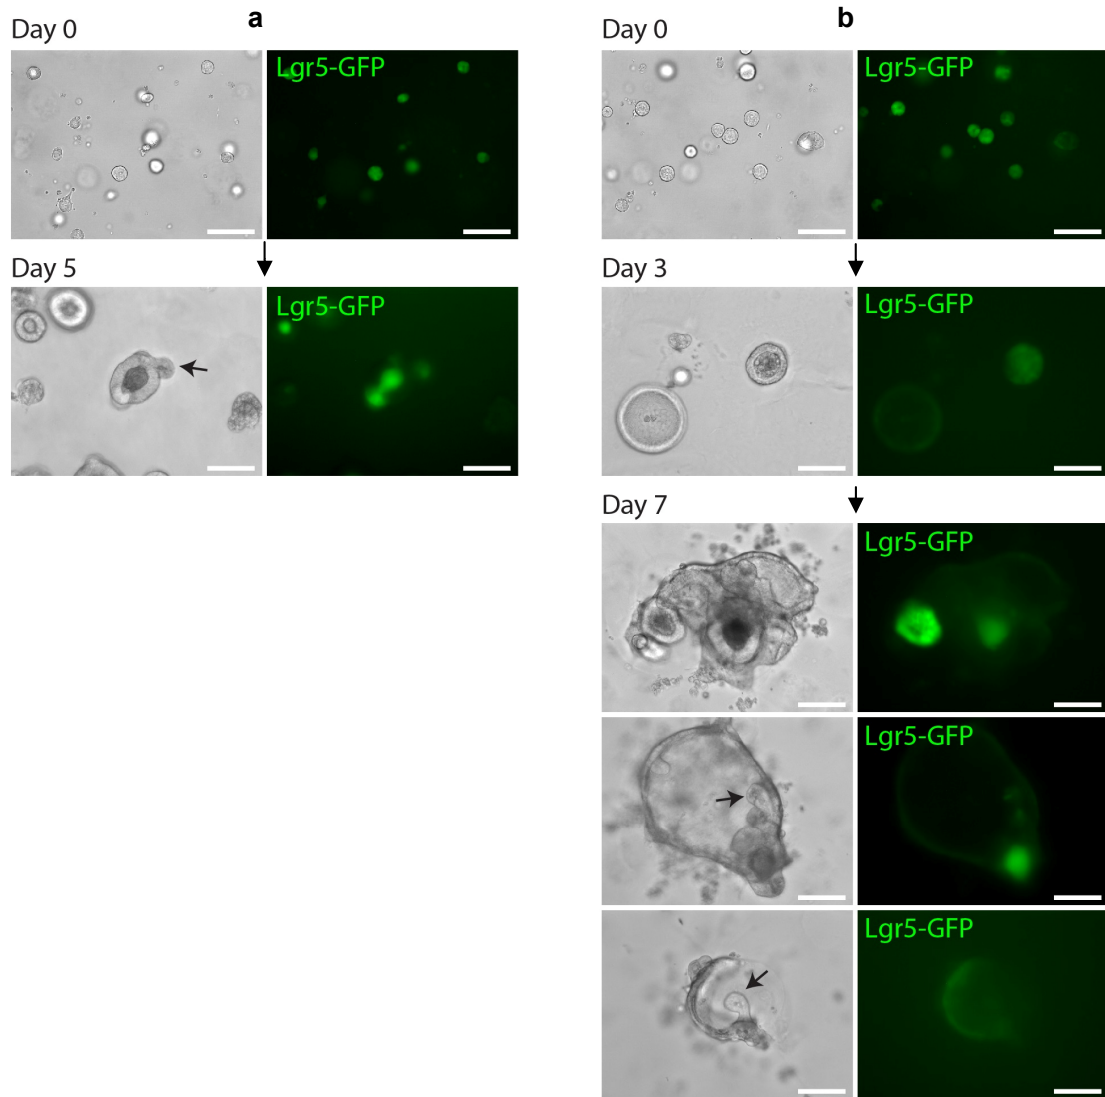

**Supplementary Figure 8. Stem cell culture.** (a) Co-culture of TTHs and mouse Lgr5<sup>+</sup> intestinal stem cells showed low cytotoxicity of TTHs with stem cells over the course of 5 days. (b) Incubation of the Lgr5<sup>+</sup> stem cells on and within the TTHs indicated the cells retained their ability of multilineage differentiation to form organoids. Scale bar: 100  $\mu$ m.

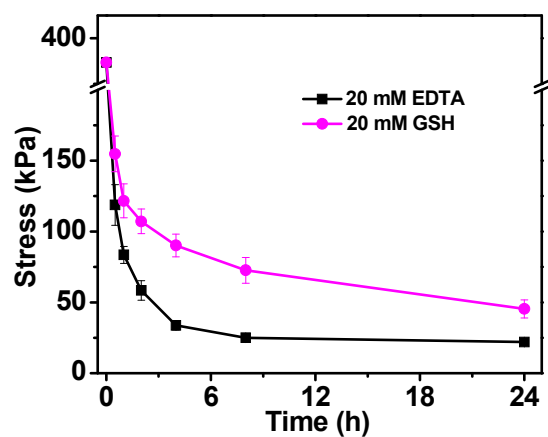

**Supplementary Figure 9. Triggerable properties of TTHs.** Plot of compressive stress of the TTH at strain of 80% versus the incubation time with 20 mM of EDTA or GSH at 37 °C. Error bars show standard deviation ( $n = 3$ ).

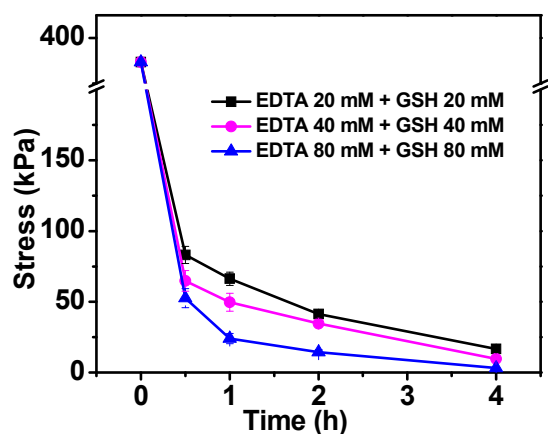

**Supplementary Figure 10. Triggerable properties of TTHs.** Plot of compressive stress of the TTH at strain of 80% versus the incubation time with EDTA and GSH in a range of concentration from 20 to 80 mM at 37 °C. Error bars show standard deviation ( $n = 3$ ).

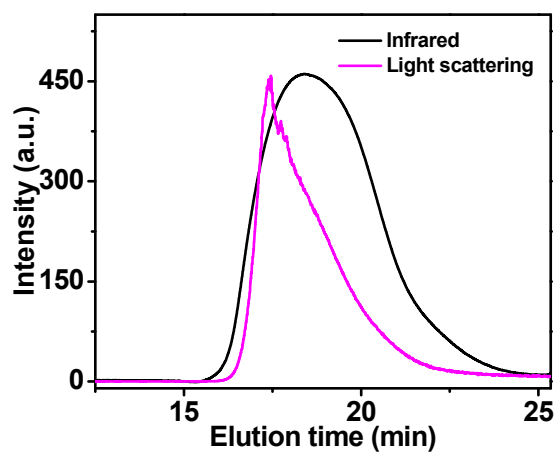

**Supplementary Figure 11. GPC measurement of the dissolved TTH.** GPC curves of the dissociated polymers from the TTH triggered by EDTA and GSH.

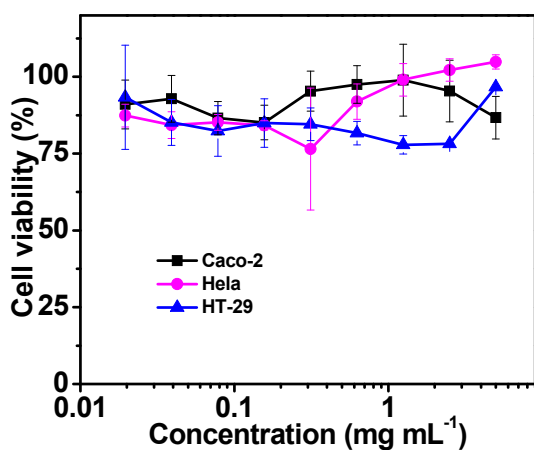

**Supplementary Figure 12. Cytotoxicity of the dissociated TTH.** Viability of cells cultured for 24 h in the medium with the dissociated TTH over a concentration range from 0.02 to 5 mg mL<sup>-1</sup>. Error bars show standard deviation ( $n = 6$ ).



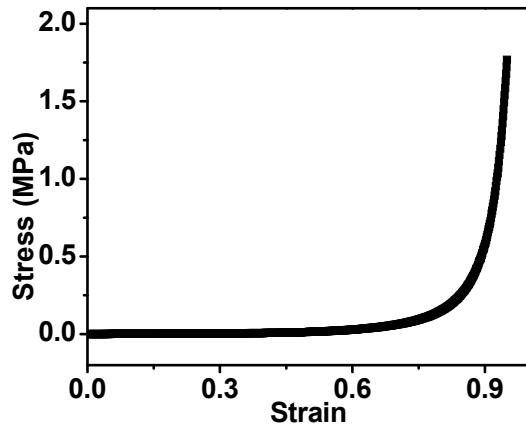

**Supplementary Figure 13. Tensile test of the TTH strip.** Compressive stress-strain curve of the TTH strip retrieved from the control pig.

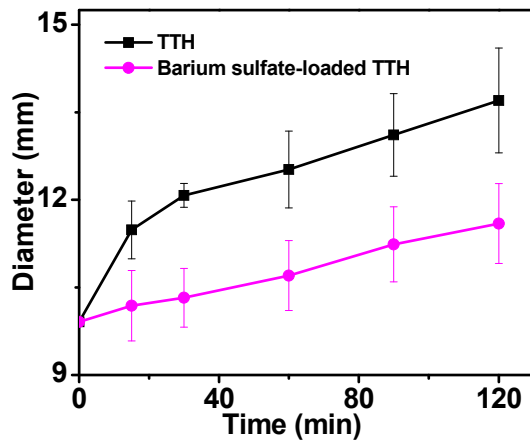

**Supplementary Figure 14. Rehydration of the barium labeled TTH.** Rehydration of dehydrated barium sulfide-loaded TTH in SGF at 37 °C. Dehydrated TTH was used as a control. Error bars show standard deviation ( $n = 3$ ).

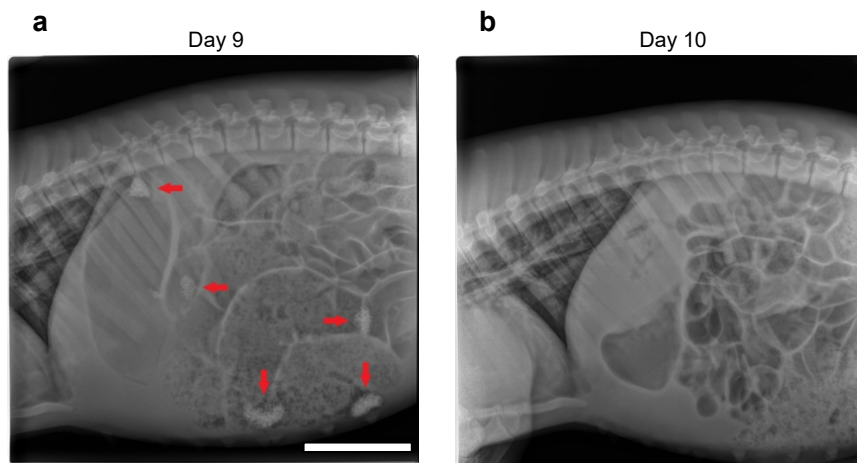

**Supplementary Figure 15. Breakage of the TTH in stomach.** Representative X-ray images of (a) the TTH device breakage in the gastric cavity and (b) the resulting fragments in the intestines of a Yorkshire pig as well as the safe pass of the fragments through the intestines in 24 h. Scale bar: 10 cm.

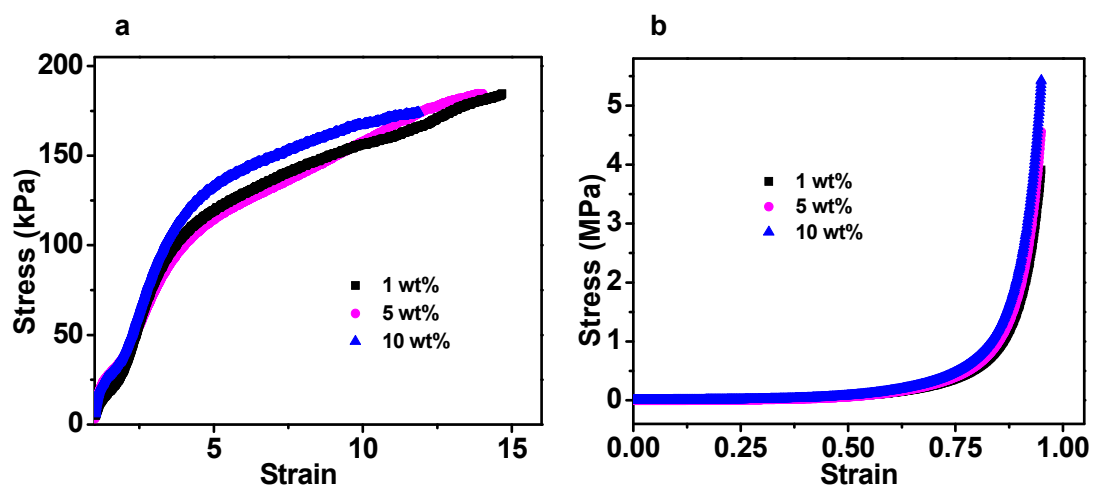

**Supplementary Figure 16. Mechanical test of drug-loaded TTHs.** (a) Tensile and (b) compressive stress-strain curves of the TTH loaded with various content of lumefantrine.

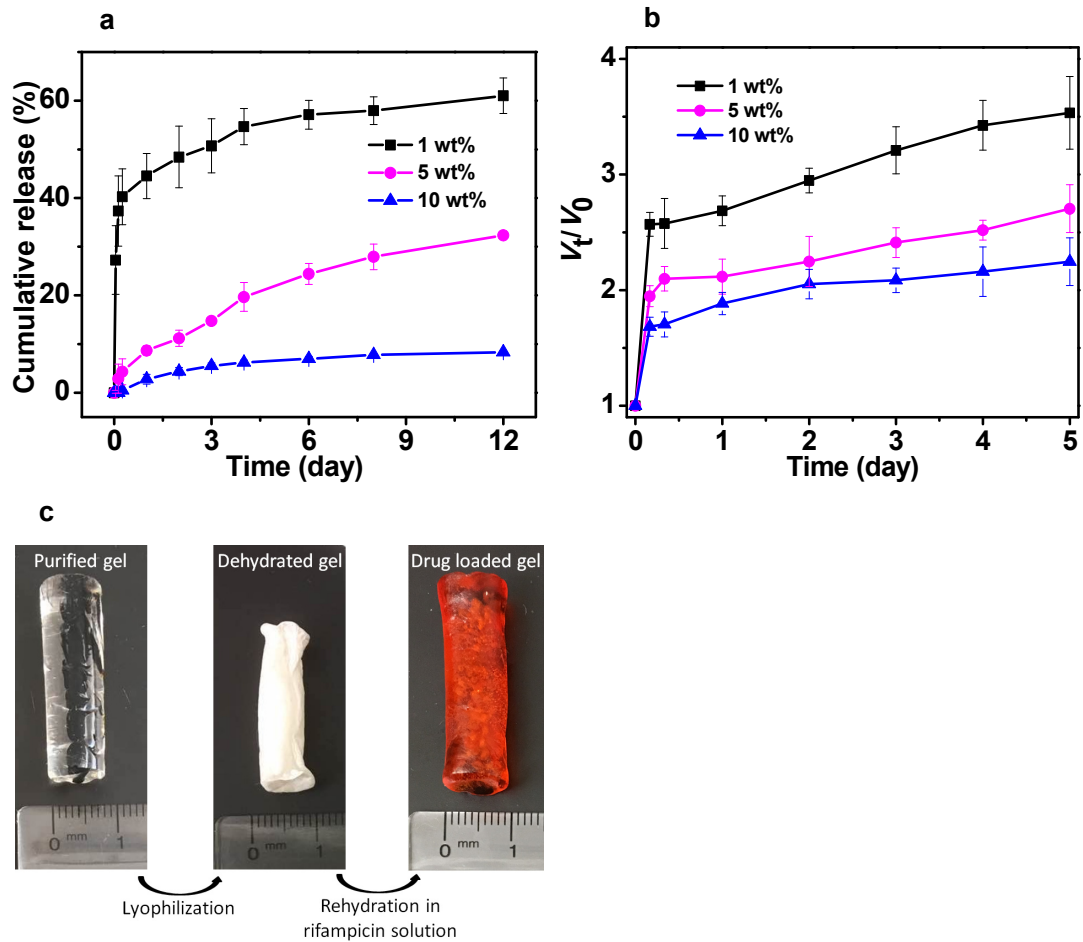

**Supplementary Figure 17. Drug loading and release of TTHs.** (a) The kinetics of release from the lumefantrine-loaded TTH in SGF at 37 °C. (b) The swelling kinetics of the drug-loaded TTH in SGF at 37 °C. Error bars show standard deviation ( $n = 3$ ). (c) Preparation route of hydrophilic rifampicin-loaded TTH.

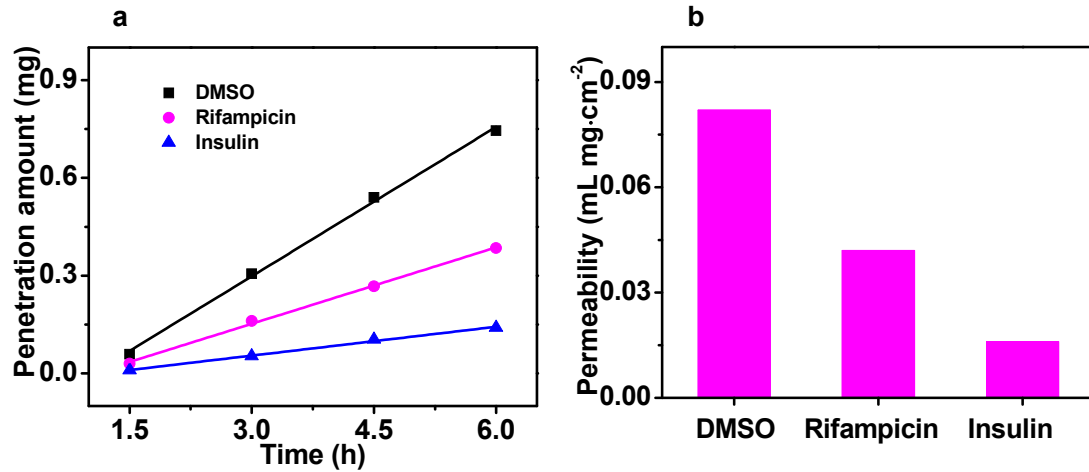

**Supplementary Figure 18. Permeability measurement.** (a) Plot of penetration amount through the TTH membrane (thickness: 3 mm) versus the incubation time. (b) The calculated permeability of DMSO, rifampicin, and insulin, respectively.

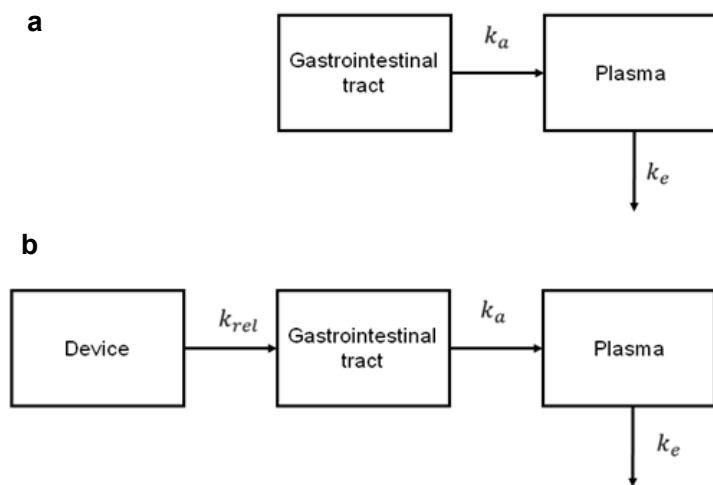

**Supplementary Figure 19. Pharmacokinetic models.** The model used to fit to the pharmacokinetic data of (a) free lumefantrine and (b) lumefantrine-loaded TTH device. The elimination rate constant and half-life were estimated to be 1.17 day<sup>-1</sup> and 14.2 h for free lumefantrine as well as 0.68 day<sup>-1</sup> (apparent elimination rate constant) and 24.3 h for lumefantrine-loaded device, respectively.
